# Supplementary figures and images for: IL‐32 and its splice variants are associated with protection against Mycobacterium tuberculosis infection and skewing of Th1/Th17 cytokines
Source: PubMed Central journal article supplement — J Leukoc Biol. 2019 Aug 4;107(1):113–8. doi: 10.1002/JLB.4AB0219-071R (PMC6972663; doi:10.1002/jlb.4ab0219-071r), 2019-08-04

Supplementary Figure 1.

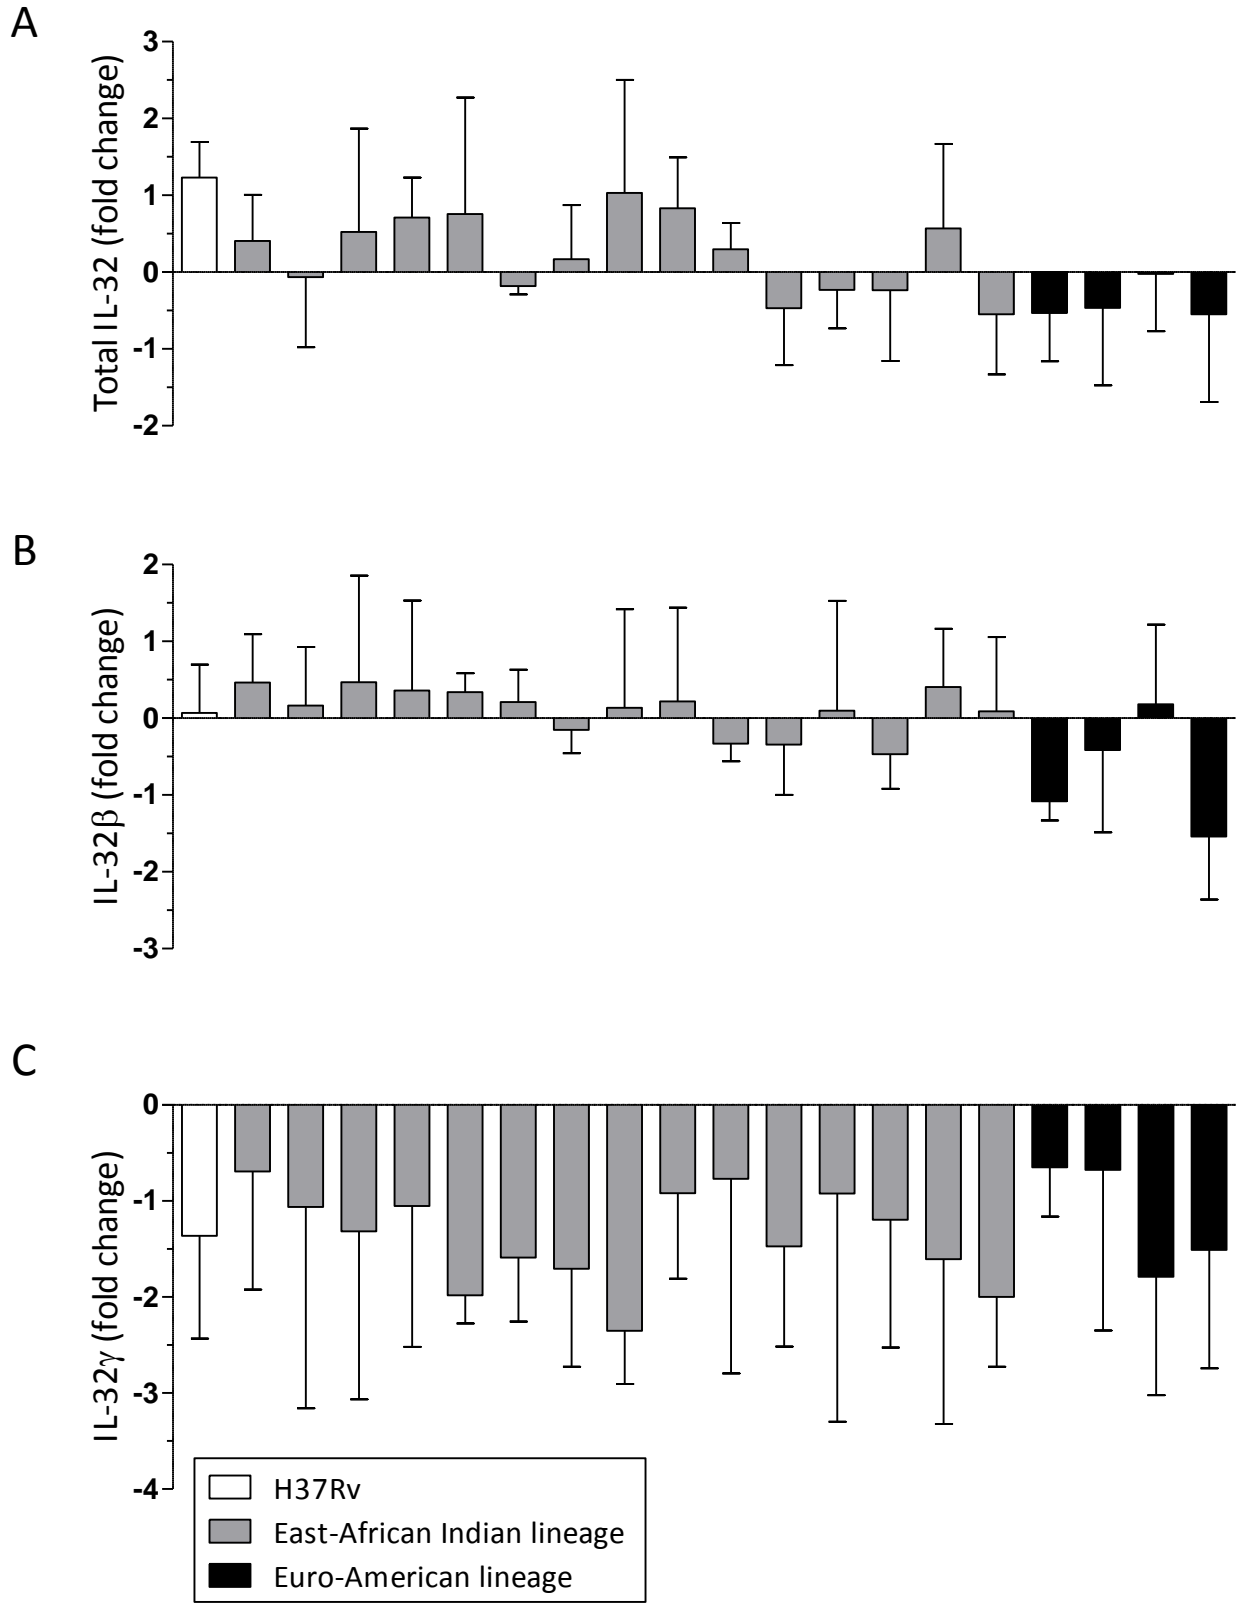

Supplement: JLB-107-113-s001.pdf [file JLB-107-113-s001.pdf]
